# Supplementary material
Source: PubMed Central journal article supplement (PMC2920301)
Supplement: gzq024_1.pdf [file gzq024_1.pdf]

### Supplemental Figure Legends

**Fig. S1.** Creation of an *adk* gene replacement vector. HB8 chromosomal DNA was PCR amplified and cloned into pUC18 to create pTT1, a vector harboring *T. thermophilus adk* (white) and approximately one thousand base pairs of adjacent chromosomal DNA (hatched). The DNA cloned into pTT1 contains a tandem duplication of the last 121 bp of *adk<sub>Tt</sub>* and 45 bp of DNA adjacent to the *adk<sub>Tt</sub>* stop codon. The gene encoding a thermostable kanamycin nucleotidyltransferase (*htk*) fused to a ribosomal binding site was cloned into the *xbaI* site of pTT1 to create pTT2. Quikchange mutagenesis was used to introduce *bmtI* and *kpnI* sites into pTT2 to create pTT2-BK, and the gene encoding *G. stearothermophilus* adenylate kinase (*adk<sub>Gs</sub>*) was cloned into these new restriction sites to create pTT-GsteAK. To prevent chromosomal recombination of *htk* without *adk<sub>Gs</sub>*, *htk* was subcloned into pTT-GsteAK using the *kpnI* and *xbaI* sites to create pTTΔ200-GsteAK. This vector contains the pUC18 origin of replication for *E. coli*, but it lacks an origin of replication for *T. thermophilus*.

**Fig. S2.** Creation of *E. coli*-*T. thermophilus* shuttle vectors for protein expression. (A) The *E. coli*-*T. thermophilus* shuttle vector pWUR112 containing a bleomycin selectable marker (*shble*) that has been engineered to function in hyperthermophiles was modified through Quikchange mutagenesis to remove the unique *ecoRI* and *xbaI* restriction sites and create pWUR112-ΔEX. An ampicillin resistance cassette (*bla*) amplified with primers that incorporated flanking *kpnI-ecoRI-xbaI* and *speI-pstI-kpnI* was cloned into the *kpnI* site of pWUR112-ΔEX to create pJJS. A PCR product containing the *T. thermophilus slpA* promoter with flanking *xbaI* and *speI-pstI* sites was cloned into pJJS using *xbaI* and *pstI* to create pJJS-Pro, and *adk<sub>Tn</sub>* was PCR amplified with flanking *ecoRI-xbaI*, digested with *XbaI* and *PstI*, and clone into the *speI* and *pstI* sites of pJJS-Pro to create pJJS-TnAK. (B) The multicloning site of pJJS-Pro contains a promoter and ribosomal binding site.

**Figure S3.** The two-step approach used to create vectors that coexpress TnN and TnC<sup>C156A</sup> protein fusions from a single polycistronic transcript. Plasmids were first created that have all pairwise combinations of *tnN* and *tnC<sup>C156A</sup>* fused to *cheA*, *cheX*, and *cheY* adjacent to a ribosomal binding site. In step 1, the genes encoding each

TnC<sup>C156A</sup> fragment fusion were digested with EcoRI and SpeI, and cloned into the EcoRI and XbaI digested pJJS-Term vectors. In step 2, the vectors created in step 1 were digested with XbaI and PstI and cloned into SpeI and PstI digested plasmids harboring genes encoding each TnN fusion protein. In the resulting plasmids, three genes (shbI, tnN fusions, tnC fusions) are transcribed as a single polycistronic transcript that is driven by the *slpA* promoter and terminated by the *slpA* terminator.

Figure S1

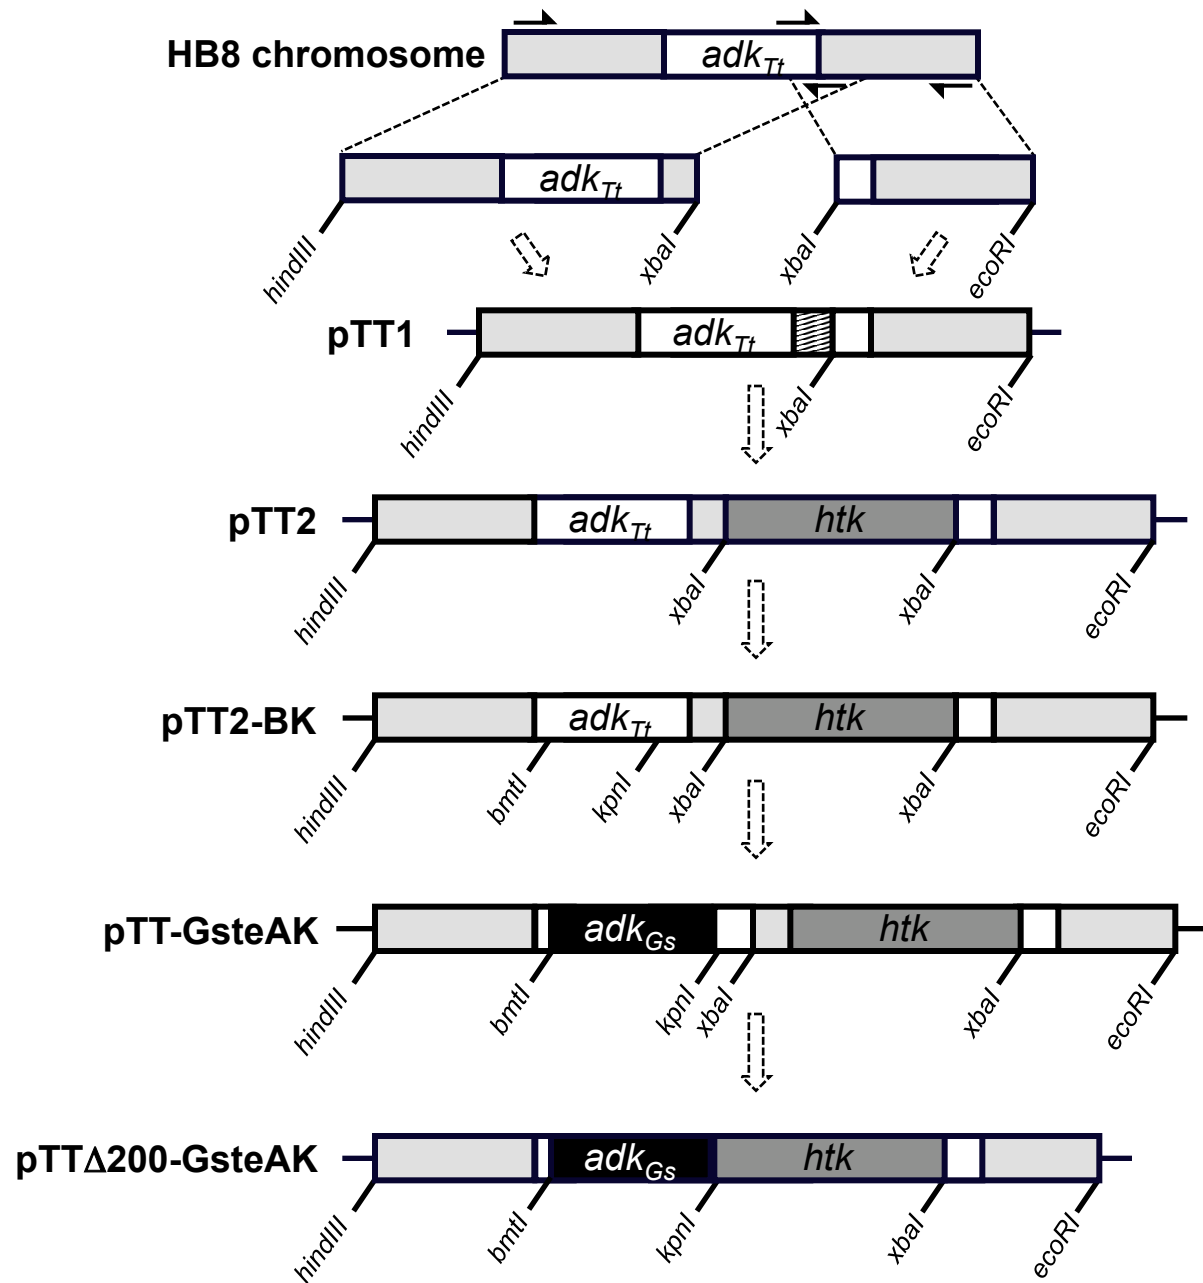

Figure S2

**A**

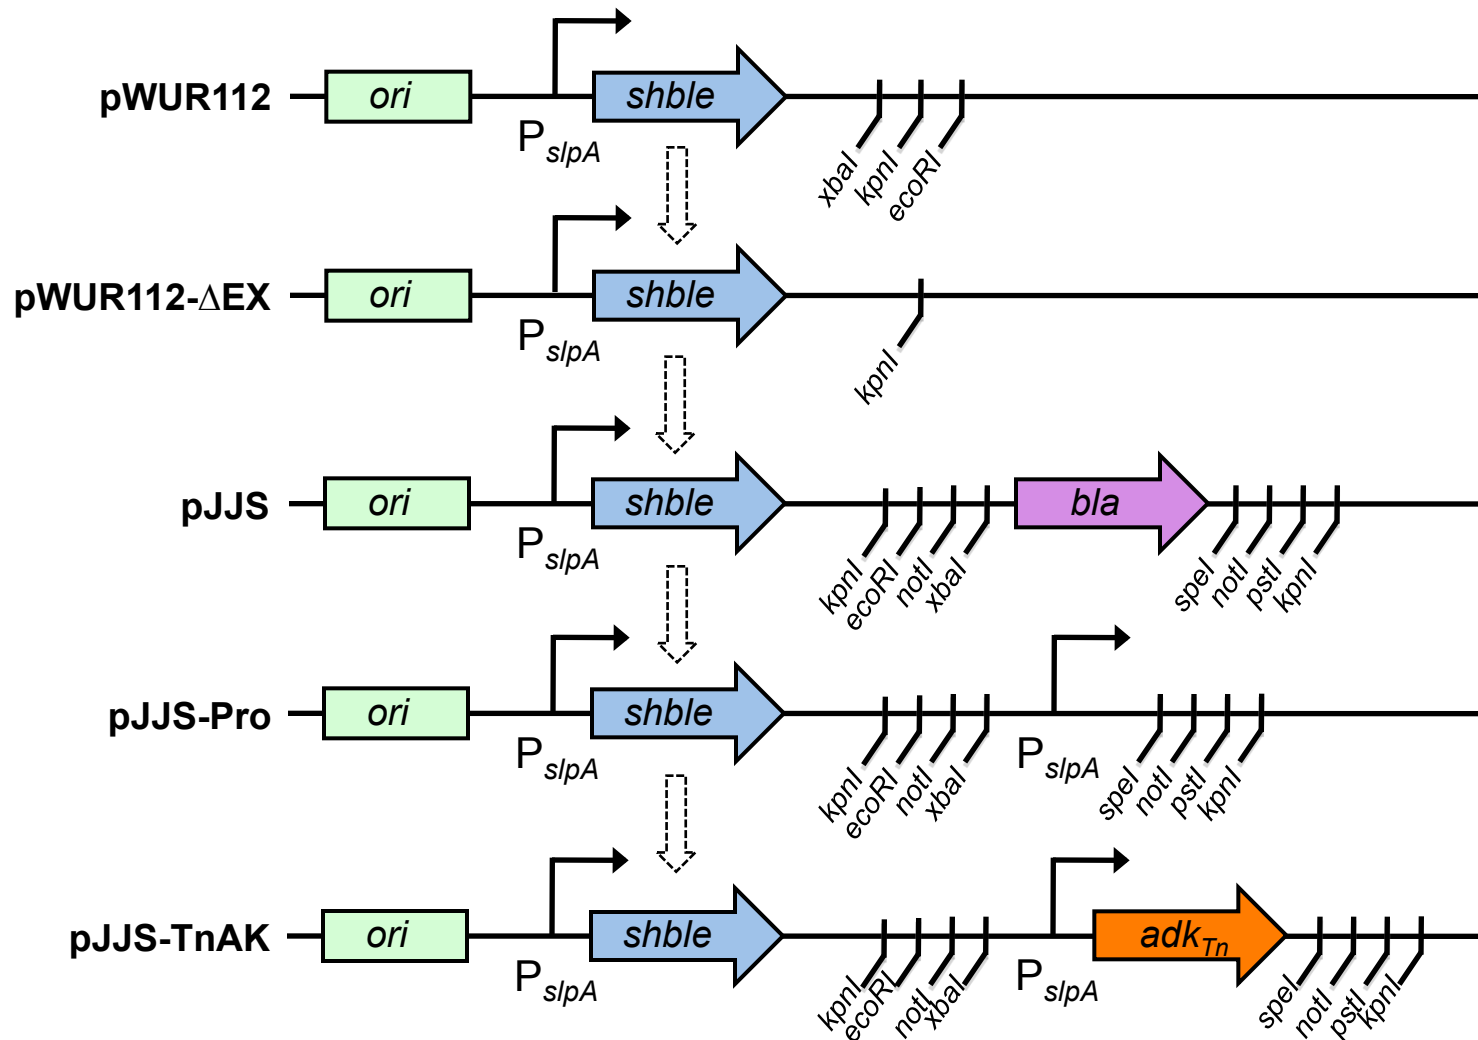

**B**

kpnI ecoRI notI xbaI  
 GGTACCGAATTCGCGGCCGCTTCTAGAGCCGGGAGTATAACAGAAACCTTAAGGCCCGACCGCTTGACAAGGGCGCGTGAGGTTTTT  
 ACGATAGCGCCGGATGCGGGGAAAAGGGCTCCTTTTGGGGGGTTTTCCCGCACCGGGCGGACCTGGGCGGAGAGGAAACGCGGCA  
 ACTCGCCCGTCTCGGGTTCCCGCCACGACCTTAAGGAGGTGTGAGGTACTAGTAGCGGCCGCTGCAGGTACC  
 RBS speI notI pstI kpnI

Figure S3

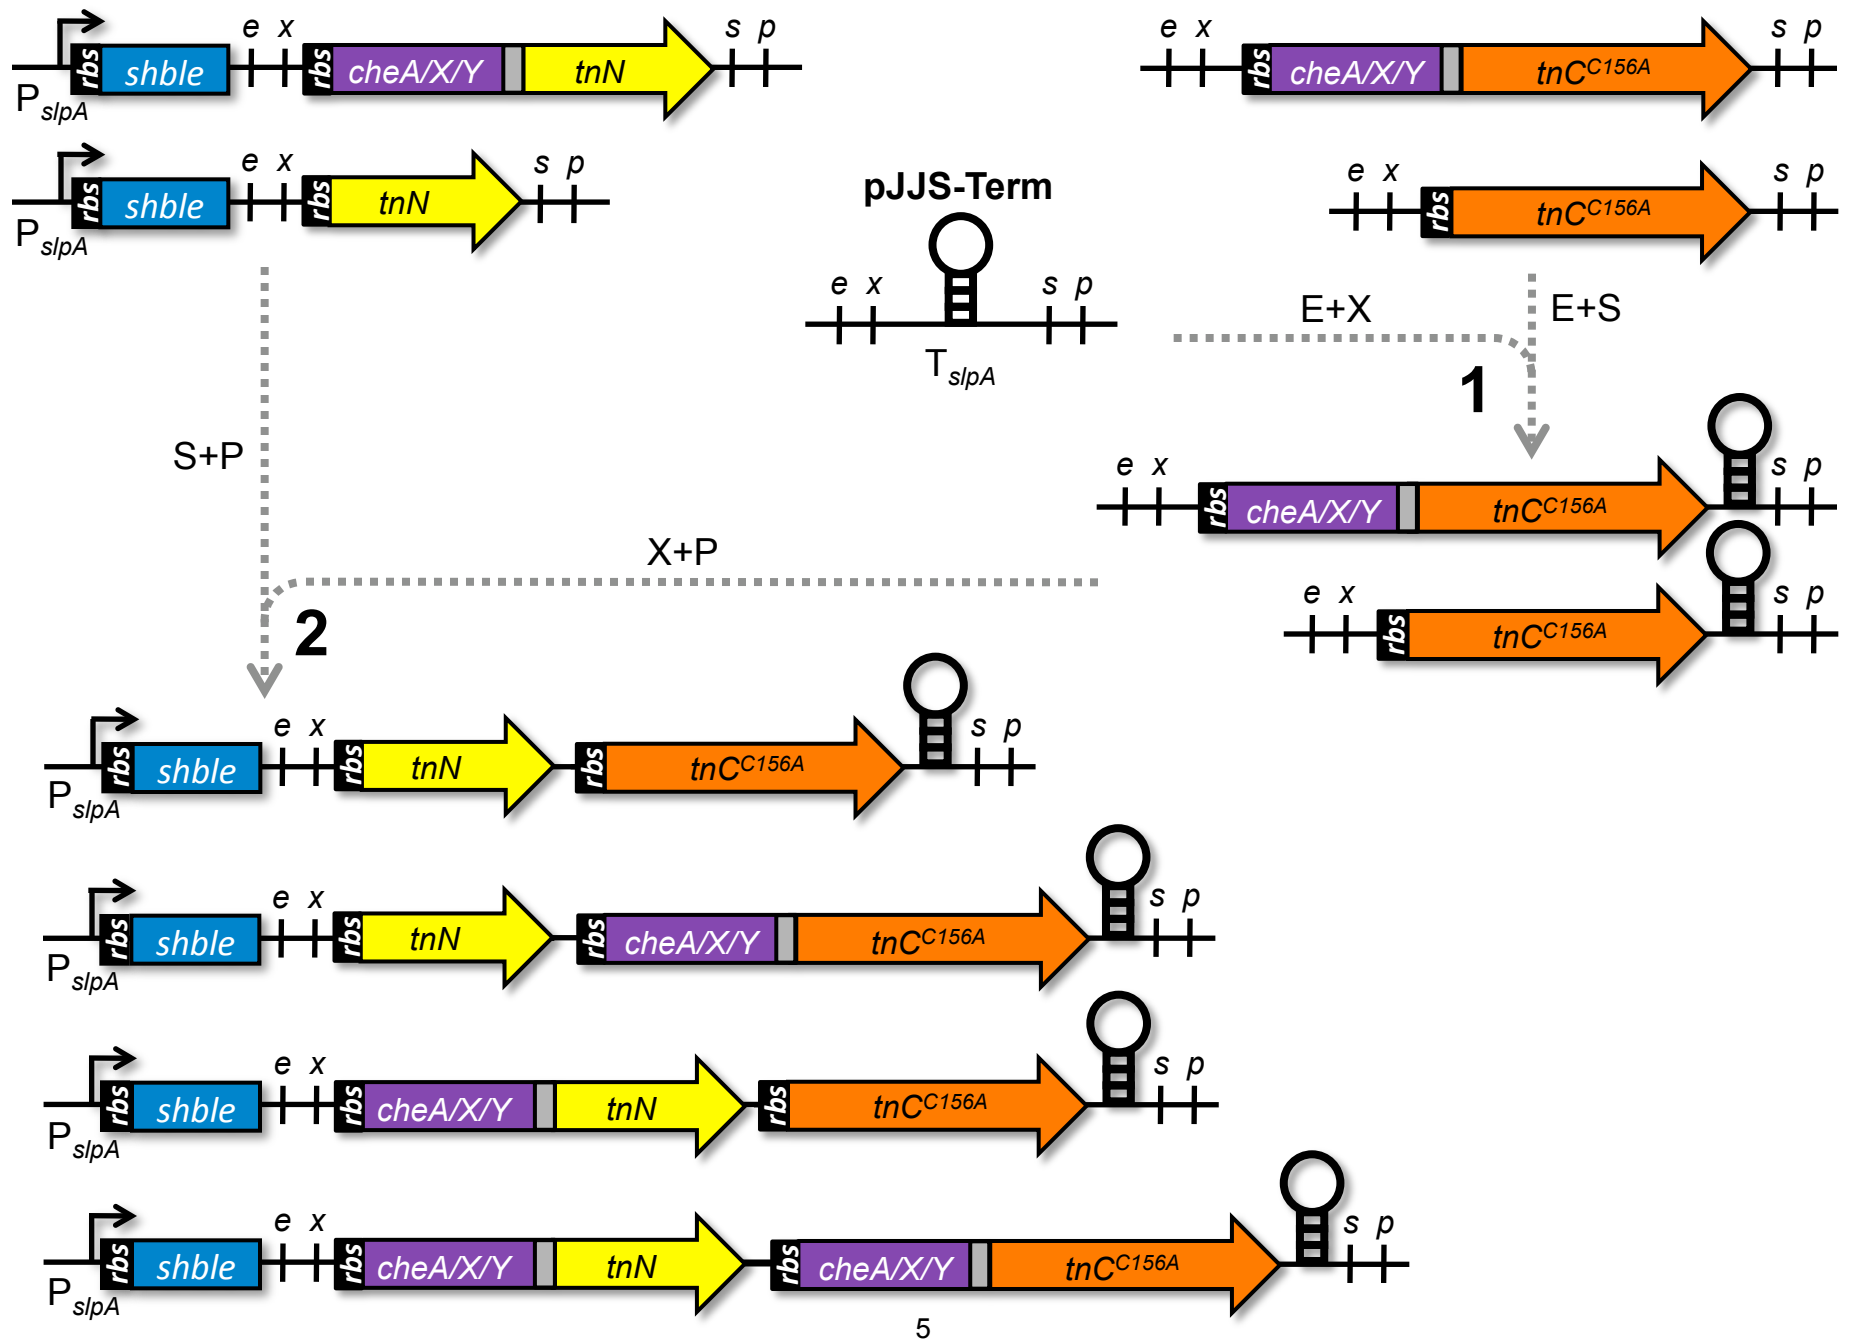

## Supplemental Tables

**Table S1.** Plasmids derived from pJJS that were used to construct protein expression vectors. The protein coding region cloned into pJJS is indicated as well as the regulatory elements cloned adjacent to that region.

| Name                                    | 5' DNA                       | Protein coding region                                   | 3' DNA                  |
|-----------------------------------------|------------------------------|---------------------------------------------------------|-------------------------|
| pJJS <sup>‡</sup>                       | ---                          | ---                                                     | ---                     |
| pJJS-Pro <sup>‡</sup>                   | <i>P<sub>slpA</sub></i> -RBS | ---                                                     | ---                     |
| pJJS-Term <sup>‡</sup>                  | ---                          | ---                                                     | <i>T<sub>slpA</sub></i> |
| pJJS-TnN                                | <i>P<sub>slpA</sub></i> -RBS | TnN                                                     | ---                     |
| pJJS-TnC                                | <i>P<sub>slpA</sub></i> -RBS | TnC                                                     | ---                     |
| pJJS-TnC133                             | <i>P<sub>slpA</sub></i> -RBS | TnC <sup>C133A</sup>                                    | ---                     |
| pJJS-TnC156                             | <i>P<sub>slpA</sub></i> -RBS | TnC <sup>C156A</sup>                                    | ---                     |
| pJJS-AN                                 | <i>P<sub>slpA</sub></i> -RBS | CheA <sup>P1P2</sup> -GASGGGSSGGHM-TnN                  | ---                     |
| pJJS-XN                                 | <i>P<sub>slpA</sub></i> -RBS | CheX-GASGGGSSGGHM-TnN                                   | ---                     |
| pJJS-YN                                 | <i>P<sub>slpA</sub></i> -RBS | CheY-GASGGGSSGGHM-TnN                                   | ---                     |
| pJJS-AC156                              | <i>P<sub>slpA</sub></i> -RBS | CheA <sup>P1P2</sup> -GASGGGSSGGHM-TnC <sup>C156A</sup> | ---                     |
| pJJS-XC156                              | <i>P<sub>slpA</sub></i> -RBS | CheX-GASGGGSSGGHM-TnC <sup>C156A</sup>                  | ---                     |
| pJJS-YC156                              | <i>P<sub>slpA</sub></i> -RBS | CheY-GASGGGSSGGHM-TnC <sup>C156A</sup>                  | ---                     |
| pJJS-rbsTnC156- <i>T<sub>slpA</sub></i> | RBS                          | TnC <sup>C156A</sup>                                    | <i>T<sub>slpA</sub></i> |
| pJJS-rbsAC156- <i>T<sub>slpA</sub></i>  | RBS                          | CheA <sup>P1P2</sup> -GASGGGSSGGHM-TnC <sup>C156A</sup> | <i>T<sub>slpA</sub></i> |
| pJJS-rbsXC156- <i>T<sub>slpA</sub></i>  | RBS                          | CheX-GASGGGSSGGHM-TnC <sup>C156A</sup>                  | <i>T<sub>slpA</sub></i> |
| pJJS-rbsYC156- <i>T<sub>slpA</sub></i>  | RBS                          | CheY-GASGGGSSGGHM-TnC <sup>C156A</sup>                  | <i>T<sub>slpA</sub></i> |
| pJJS-rbsTnN                             | RBS                          | TnN                                                     | ---                     |
| pJJS-rbsAN                              | RBS                          | CheA <sup>P1P2</sup> -GASGGGSSGGHM-TnN                  | ---                     |
| pJJS-rbsXN                              | RBS                          | CheX-GASGGGSSGGHM-TnN                                   | ---                     |
| pJJS-rbsYN                              | RBS                          | CheY-GASGGGSSGGHM-TnN                                   | ---                     |

<sup>‡</sup> Full sequence for vector is provided in supplement.

**Table S2.** Vectors used for complementation studies in *T. thermophilus* PQN1.

| Name                   | Proteins expressed                                    | Expression    |
|------------------------|-------------------------------------------------------|---------------|
| pJJS-TnAK <sup>‡</sup> | AK <sub>Tn</sub>                                      | monocistronic |
| pJJS-N+C <sup>‡</sup>  | TnN & TnC                                             | monocistronic |
| pJJS-N+C133            | TnN & TnC <sup>C133A</sup>                            | monocistronic |
| pJJS-N+C156            | TnN & TnC <sup>C156A</sup>                            | monocistronic |
| pJJS-N+C156-poly       | TnN & TnC <sup>C156A</sup>                            | polycistronic |
| pJJS-YN+AC156          | CheY-TnN & CheA <sup>P1P2</sup> -TnC <sup>C156A</sup> | polycistronic |
| pJJS-YN+XC156          | CheY-TnN & CheX-TnC <sup>C156A</sup>                  | polycistronic |
| pJJS-YN+YC156          | CheY-TnN & CheY-TnC <sup>C156A</sup>                  | polycistronic |
| pJJS-YN+C156           | CheY-TnN & TnC <sup>C156A</sup>                       | polycistronic |
| pJJS-N+AC156           | TnN & CheA <sup>P1P2</sup> -TnC <sup>C156A</sup>      | polycistronic |
| pJJS-XN+XC156          | CheX-TnN & CheX-TnC <sup>C156A</sup>                  | polycistronic |
| pJJS-N+XC156           | TnN & CheX-TnC <sup>C156A</sup>                       | polycistronic |
| pJJS-XN+C156           | CheX-TnN & TnC <sup>C156A</sup>                       | polycistronic |
| pJJS-XN+AC156          | CheX-TnN & CheA <sup>P1P2</sup> -TnC <sup>C156A</sup> | polycistronic |

<sup>‡</sup>Full sequence for vector is provided in supplement.

## Supplemental DNA Sequences

DNA sequences are provided for the vector used for gene replacement (pTT $\Delta$ 200-GsteAK), vectors frequently used in the construction of *T. thermophilus* expression vectors (pJJS, pJJS-Pro, and pJJS-Term), as well as representative examples of the expression vectors used for complementation studies (pJJS-TnAK and pJJS-N+C).

### **pTT $\Delta$ 200-GsteAK (6,251 bp)**

```
TCGCGCGTTTTCGGTGATGACGGTGAAAACCTCTGACACATGCAGCTCCCGGAGACGGTCACAGC
TTGTCTGTAAGCGGATGCCGGGAGCAGACAAGCCCGTCAGGGCGCGTCAGCGGGTGTGGCGGG
TGTCGGGGCTGGCTTAACTATGCGGCATCAGAGCAGATTGTAAGTGCAGAGTGCACCATATGCGGT
GTGAAATACCGCACAGATGCGTAAGGAGAAAAATACCGCATCAGGCGCCATTCGCCATTCAGGCT
GCGCAACTGTTGGGAAGGGCGATCGGTGCGGGCCTCTTCGCTATTACGCCAGCTGGCGAAAGGG
GGATGTGCTGCAAGGCGATTAAGTTGGGTAACGCCAGGGTTTTCCAGTACGACGTTGTAAAA
CGACGGCCAGTGCCAAGCTTGTACACCCGCATCGGGGGCATCGCCCTGGGCGCCTTCAGGGGT
TCTTCCTGGCCACGGCCTTTTTGGGGGCCGAGGGGGGCCGCTTCCTCCTCCCGGGCTGGTCCCC
CGGCCCTTCTTCTGGTTTCGTGGTGGTGGTACCAGGTGGCGGGCATCGCCCTCCTCCTGTGG
ATGGCGGAGCGCATACCGAGTACGGCATCGGCAACGGCACGAGCCTCATCATCTTCGCCGGGA
TCGTGGTGGAAATGGCTTCCCCAGATCCTGCGCACCATAGGCCCTCATCCGCACCGGGGAGGTCAA
CCTGGTGGCCTTCCTCCTTCTTCCTCGCCTTCATCGTCCTGGCCTTCGCCGGCATGGCCGCCGTC
CAGCAGGCCGAGCGCAGGATCCCCGTCCAGTACGCCCGCAAGGTGGTGGGGCGCAGGGTCTACG
GGGGCCAGGCCACCTACATCCCCATCAAGCTCAACGCCGCCGGGGTGATCCCCATCATCTTCG
CGCGGCCATCCTGCAGATCCCCATCTTCCTGGCCGCCCTTCCAGGACAACCCCGTGTGCAG
GGCATCGCCAACTTCTTCAACCCACCCGGCCTTCGGGGCTTTCATAGAGGTCTCCTCGTCA
TCCTCTTACCTACGTCTACACCGCCGTCCAGTTTGACCCCAAGCGCATCGCCGAGTCGCTGCG
GGAGTACGGGGGGTTCATCCCGGGGATCCGCCCGGGCGAGCCACGGTGAAGTTCCTGGAGCAT
ATCGTTTTCCCGTCTCACCTCTGGGGGGCCCTCTTCCTTGGGCTCGTGACCTCCTTCCCCAGA
TCATCCAGAACCTCACCGGCATCCACAGCATCGCCTTCTCAGGCATCGGCCTCCTCATCGTGGT
GGCGTGGCCTTGGACACCCTGAGGCAGGTGGAGAGCCAGCTCATGCTCAGGAGCTACGAGGGC
TTCCTCTCCCGCGGGCGCCTGCGGGGGCGGAACCGGTAGGAGGTGGACGTGGGGCTAGCATGAA
TTTAGTACTAATGGGTTTGCCTGGTGC CGGAAAAGGTACTCAAGCGGAAAAAATTGTTGAAACA
TACGGAATTCGCATATTTCCACTGGTGTATGTTCCGTGCGGCCATTAAGAGGGGACACCAT
TAGGATTGCAAGCAAAAGAATATATGGATCGCGGCATCTTGTTCGGATGAAGTAACCATCGG
CATCGTTCGCGAACGTTTAAGCAAAGACGATTGTCAAAAAGGGTTTTTGTAGACGGATTCCCA
CGGACGGTTGCCCAAGCGGAAGCGTTAGAAAACATTCTTGCCGAATTAACCGCTCGATTGATT
ATGTCATTCATATTCATGTAGATAAAGATATTTTAATGGAACGGCTGACAGGAAGAAGAATTTG
CAAAAATTGTGGCGCAACGTACCATCTAGTATTTAATCCGCCGCAAAGCCAGGCGTTTGCAT
AAATGCGGCGGCGAACTATAACCAACGCGCCGATGATAACGAAGAGACGGTAGCCAACCGGCTCG
AAGTAAACGTCAAACAAACGCAGCCGCTGCTGGATTTTTACGAGAAAAAAGGATACCTACGCCA
CATCAACGGACAGCAAGATATTGAAAAAGTATTCGCCGATATTCGTGAGCTTCTCGGATAGGGT
ACCGTACCGGGCGCTTGCATGCGGCGTGCAGTAGAATTCATGAAAGGACCAATAATAATGACTA
GAGAAGAAAGAATGAAGATTGTTTCATGAAATTAAGGAACGAATATTGGATAAATATGGGGATGA
TGTTAAGGCAATTGGTGTTTATGGCTCTCTTGGTTCGTCAGACTGATGGGCCCTATTTCGGATATT
GAGATGATGTGTGTTCTGTCAACAGAGGGAGTAGAGTTCAGCTATGAATGGACAACCGGTGAGT
GGAAGGCGGAAGTGAATTTTTATAGCGAAGAGATTCTACTAGATTATGCATCTCGGGTGAACC
```



GGATTGGCCGCTTACACATGGTCGATTTTTCTCTATTTTGCCGATTTATGATCCAGGTGGATAC  
TTTGAGAAAGTGTACCAAAGTCTAAATCGGTAGAAGCCCAAAGTTCCACGATGCGATCTGTG  
CCCTTATCGTAGAAGAGCTGTTTGAATATGCAGGCAAATGGCGTAATATTCGTGTGCAAGGACC  
GACAACATTTCTACCATCCTTGACTGTACAGGTGGCAATGGCAGGTGCCATGTTGATTGGTCTG  
CATCATCGCATCTGTTATACGACGAGCGCTTCGGTCTTAACTGAAGCAGTTAAGCAACCAGATC  
TTCCTCCAGGTTATGTCCAAGTGTGCCAGCTCGTAATGTCTGGTCAACTTTCCGACCCTGAGAA  
ACTTCTGGAATCGCTAGAGAATTTCTGGAATGGGGTTCAGGAGTGGGCGGAACGACACGGATAT  
ATAGTGGATGTGTCAAACGCATACCATTTTGAACGATGACCTCTAATAATTGTTAATCATGTT  
GGTTACGTCTAGACCGGGAGAAAACCGAGCCCCTGGTGGGCTACTATGAGGCCAGGGGGGTGCT  
GAAGCGGGTGGACGGGCTCGGCACCCCGGACGAGGTCTACGCCCGGATCCGGGCGGCGTTAGGG  
ATCTGATGGCCATCAAGCTGAAAAGCCCCTGGGAGATTGAGCGCATGCGGGAGGCGGGGGCCCT  
CCTCACCGAGGTGGTGGAGGAGGTGGCCCGCCACGTGGAGCCCGGCGTCTCCACCTGGGAGCTG  
GACCAGATCGCTACGAGGCCATCCGCAAGCGCAAGGCCAAGCCCGCCTTCTCGGGCTCTACG  
GCTTCCCCGCCACCCTTTGCACCTCGGTGAACGAGGTGGTGGTCCACGGCATCCCCTCCAAGGA  
GCCCCTGAAGGAAGGGGACATCCTCTCCGTGGACGTGGGCCTCATCTACCAGGGGTTCCGCCGC  
GACATGGCCCGCACCTTTCCCGTGGGCCGGGTCTCGCCGGAGGCGGAGAGGCTCATCCGGGACA  
CGGAGGCCGCCTTCTGGGAGGGGATGAAGTACCTGCGCCCGGGCTTCCGCCTCGGCGACGTGGG  
CCACGCCATCCAGACCTTCTTGAGAGCCGGGGCTACGGGGTGGTCCGGGAGTTCGTGGGGCAC  
GGGGTGGGCCGGGAGATCCACGAGGACCCCGAGGTGCCGAACCTTCGGCAAGCCCGGACCGGGC  
CCAAGATCCGCCCGGGATGACCCTGGCCCTCGAGCCATGGTCACCTTAAGGCCCGCACCTGT  
GGTAATATTGGACGATGGCTGGGCGGCGAGCGCCGGCCGAGGCCAACCTCGCCGCCCATTACGAG  
AACACCGTCTGGTGACGGAAGAAGGCCCCCGAGCTTCTCACCGGGTCCGCCCTGGCGCGGGCCG  
AGTAGGGAGGGGTATGGCGAAGGAGAAGGACACCATTTCGGACGGAGGGCGTGGTCCACGAGGCG  
TTGCCCAACGCCACCTTTCGCGTGAAGCTGGACTCGGGGCCGGAGATTTTGGCCTACATCTCGG  
GCAAGATGCGGATGCACTACATCCGCATCCTCCCCGGGGACCGGGTGGTGGTGGAGATCACCCC  
CTACGACCCACGCGGGGCCGGATCGTTTACCGCAAGTAGGAGGCAGAATTCGTAATCATGGTC  
ATAGCTGTTTCTGTGTGAAATTGTTATCCGCTCACAATTCCACACAACATACGAGCCGGAAGC  
ATAAAGTGTAAGCCTGGGGTGCCTAATGAGTGAGCTAACTCACATTAATTGCGTTGCGCTCAC  
TGCCCGCTTTCCAGTCGGGAAACCTGTGCTGCCAGCTGCATTAATGAATCGGCCAACGCGCGGG  
GAGAGGCGGTTTGCGTATTGGGCGCTCTTCCGCTTCTCGCTCACTGACTCGCTGCGCTCGGTC  
GTTCCGCTGCGGCGAGCGGTATCAGCTCACTCAAAGGCGGTAATACGGTTATCCACAGAATCAG  
GGGATAACGCAGGAAAGAACATGTGAGCAAAGGCCAGCAAAGGCCAGGAACCGTAAAAAGGC  
CGGTTGCTGGCGTTTTTCCATAGGCTCCGCCCCCTGACGAGCATCACAAAAATCGACGCTCA  
AGTCAGAGGTGGCGAAACCCGACAGGACTATAAAGATACCAGGCGTTTCCCCCTGGAAGCTCCC  
TCGTGCGCTCTCCTGTTCCGACCCTGCCGCTTACCGGATACCTGTCCGCCTTTCTCCCTTCGGG  
AAGCGTGGCGCTTCTCATAGCTCACGCTGTAGGTATCTCAGTTCGGTGTAGGTGCTTCGCTCC  
AAGCTGGGCTGTGTGCACGAACCCCCGTTCCAGCCGACCGCTGCGCCTTATCCGGTAACTATC  
GTCTTGAGTCCAACCCGGTAAGACACGACTTATCGCCACTGGCAGCAGCCACTGGTAACAGGAT  
TAGCAGAGCGAGGTATGTAGGCGGTGCTACAGAGTTCTTGAAGTGGTGGCCTAACTACGGCTAC  
ACTAGAAGGACAGTATTTGGTATCTGCGCTCTGCTGAAGCCAGTTACCTTCGGAAAAAGAGTTG  
GTAGCTCTTGATCCGGCAAACAAACCACCGCTGGTAGCGGTGGTTTTTTTTGTTTGCAAGCAGCA  
GATTACGCGCAGAAAAAAGGATCTCAAGAAGATCCTTTGATCTTTTCTACGGGGTCTGACGCT  
CAGTGGAAACGAAAACCTCACGTTAAGGGATTTTGGTCATGAGATTATCAAAAAGGATCTTCACCT  
AGATCCTTTTAAATTAATAATGAAGTTTTAAATCAATCTAAAGTATATATGAGTAAACTTGGTC  
TGACAGTTACCAATGCTTAATCAGTGAGGCACCTATCTCAGCGATCTGTCTATTTTCGTTTCATCC  
ATAGTTGCCTGACTCCCCGTCGTGTAGATAACTACGATACGGGAGGGCTTACCATCTGGCCCCA  
GTGCTGCAATGATACCGCGAGACCCACGCTCACCGGCTCCAGATTTATCAGCAATAAACAGCC

AGCCGGAAGGGCCGAGCGCAGAAGTGGTCCTGCAACTTTATCCGCCTCCATCCAGTCTATTAAT  
TGTTGCCGGGAAGCTAGAGTAAGTAGTTCGCCAGTTAATAGTTTGCGCAACGTTGTTGCCATTG  
CTACAGGCATCGTGGTGTACGCTCGTCGTTTGGTATGGCTTCATTTCAGCTCCGGTTCCCAACG  
ATCAAGGCGAGTTACATGATCCCCATGTTGTGCAAAAAGCGTTAGCTCCTTCGGTCTCCG  
ATCGTTGTCAGAAGTAAGTTGGCCGAGTGTATCACTCATGGTTATGGCAGCACTGCATAATT  
CTCTTACTGTATGCCATCCGTAAGATGCTTTTCTGTGACTGGTGAGTACTCAACCAAGTCATT  
CTGAGAATAGTGTATGCGGCGACCGAGTTGCTCTTGGCCGGCGTCAATACGGGATAAATACCGCG  
CCACATAGCAGAACTTTAAAAGTGTCTCATCATTGGAAAACGTTCTTCGGGGCGAAAACCTCAA  
GGATCTTACCCTGTTGAGATCCAGTTCGATGTAACCCACTCGTGACCCCAACTGATCTTCAGC  
ATCTTTTACTTTTACCAGCGTTTCTGGGTGAGCAAAAACAGGAAGGCAAAATGCCGCAAAAAG  
GGAATAAGGGCGACACGGAAATGTTGAATACTCATACTCTTCTTTTCAATATTATTGAAGCA  
TTTATCAGGGTTATTGTCTCATGAGCGGATACATATTTGAATGTATTTAGAAAAATAAACAAAT  
AGGGGTTCCGCGCACATTTCCCCGAAAAGTGCCACCTGACGTCTAAGAAACCATTATTATCATG  
ACATTAACCTATAAAAATAGGCGTATCACGAGGCCCTTTCGTC

**pJJS (5,395 bp)**

AGCTTGCATGCCTGTTGGCATGCCTCAGTTGACCCATTGACCCTTCTCTCTGGAGGTGGTAGC  
TAGAGGGGAATGGTCCCACCCTGGAGCCCCACCCTTGCCAACCCTGGGCCCCGGTATAATGCCG  
GGCAATGGGAAGACCGGGCCCCCTGGGGGCCCAAGGCGCAGGGCCGCGTGAGGACCAAAAAGA  
GAGGCTCCCGCTGGGAGGGAACCCAAATTCAGCAACCTTTTTCTTCGCCTAAGGTTATCCCCT  
CCCAGCGGGAAAGGCAATAGGCGCAAGGCGGCGCGGGGGAGTGCCGTCTCCGACGCGCGAA  
ACGGGAGGGGTTTATGCCCAAGAAGGAGTTGAAGGGAAGAGCTATAAAGAACAGCCGGAAGGA  
CTCACCGAGCGGGGCCGGCCTTCTCGAGGCCCTGGCCCCGAGGAAGCGGGCGAGGGGCGAGG  
AGCTTCCGCCCCCTTACCTGAAGCTCCTGGAGGGGGCCGCGCCCCCGGAGAAGGGGGTCCATGA  
GCCCCCGCCCGAGGAGGCGCCTCCCCCGGAGGACCTCCGCCGGAAGCTCCGGGAGGCGCCGCT  
TCCCCGGCCCTCCCCAACCGACAGGAGCTCTCCGCCTCCCCGCCCCCGCCGAGATGAGGCGGG  
ACGCTTGAGCCTCGCCGACCGCCTCCTGGAGGAGGGGAGCGCGGGGCACCCTGCCAGGGCT  
TTCCGAGCGGGAGCGGAGGGTGTACCGGACCCTCCTCGCCCTGGGCTCGAGGTCCTGGCCCCG  
AGGCTGGGCCCCGGGAGGCCCTGCCAGGAACCTGTCCAGGTCTCCTTCTTCGCCGTGAACG  
ACGCCCTGGCCGTGGCCCTGGGAATCCCCCGGCCTCCCTCTACCGGGTCTTGCCCTCCCTGGA  
GGCCAAGGGGCTCATCCGCCGAGGGCCTGGCGCACCCCGGCCACCCTCAAGGGCCGGACGGGG  
GTCTACGCCGGCGGGACCCTCTACGCCGTGCGCCTGCCCCACCGGGAGGCCCGCCCCGCCTGG  
ACCCGGAGGACTTCCGCCACCCTGGCGGGACCTGGAGGGGGACGCCCGTCAGGGGCGCACCGC  
CTGGAGCTTGAGAGAGTCATATACAAGTCTCCTAAGGAGGACTCCGGGGTCTCCAGCTCCTC  
CTTCGGTTTTTCGTTATCCCCTGGCGAAGCCGAAACTCCGTTAGCTTTAGACTCTCTCACCGCCC  
TCTTCCGGGCCCGCCCCGCGAGCGCCGGGCCCTGGTGGAGGCCCTCGCCCTCTCCCTGGCCCCG  
GGAGTTCCGGGATCCCGGGAGCGTGCGCTTCTACGCCCTGGGTCTCTGGAACGCCCTCCGGGCC  
GAGCTCTACGGCCTGATGGAGGGGGCCCTCGAGGCCGTGCGCTGGGCGGTCCGGCGGGCGCGGG  
AGGCCGCGGCCAAGGTCTCTGGAGCCCAGGGGCGAGGGGGTCCGGCGCCCCGGGGCCCTCCT  
CGCCACCTCCTCCGGGAGCGGGGCCTCCTGGAGCTCTTCCGCCAGGCCCTCAGTGGCGGGTG  
GCGTAGGGCTCCCGCCGGGCTAAGCTGGAGGTAGCCCATCCAGGGCCTCTGGGGGGTGGCTTGT  
GTATCAAGACTGGCTGTTCAAGGACTGCCAGGGGGCTGGCGCCTCCGCTACCGCCGGAACGGG  
GGCGGCTACGAGGCTCCCGGGACGGTGAAGGTGGGAGAAGGTCCCCTCGGTCACGGAGGTTA  
CGGGGCGCCTGAACAAGAACCTTCAGGACTGGGCCGTGCGCCAGGTGGTGGAGTACCTCCAGGG  
GGAGCTGGTCCCGGGGCTGGTCTCACGGAGGAGGAGGTGAACCGCCTCCTGGACGGTGCCTCC  
AAAGCCCACCGCCTGGCCGCGCAGAGGGCCGCGGGCGAGGCGCCGACCTCCACGCTGGGCGG  
AGGCCTACCTCAAAGGGCAAAGGCCTCCCTTCCCCGAGGAGGAGCCCCCTTCGGGGGATGGCCCT

CGCCCTGGCGGACTGGTGGGACGGGAACGGGGGCGAGGCCCTGCGCTCCGAGGAGGCGGTCTTC  
CACCCGGAGCACCGCTACGCCGGGCGGGTGGACCTGGTGGCCCGGCTGGGGGGGAGGGTGGTGG  
TGGTGGACCTGAAGACCTCCCCCGGGCCTACCCGGAGCACCTCCTCCAGGTGGGGGCCTACCC  
CCTGGCCCTCCGGGCGGAGGGGGTGGCGGTGGAGGGGGGCTTCGTGCTGGCCCTGAGGGAAGGC  
TTAGCCTCCAGGAGGTCCCCCTGGAGGAGGCGGCGCAGGCCTTCCTGGGGCTCCTGGCCGTCCA  
CCGCTTTCTGAAGTCTCGAGGCTACCCCTGAGCACCCGCTTGTACCACACCTTAAGGGCCT  
CGAGGTCCCAGGCCACCACCGCCCGGCTCCCGTCGGGCGGGGATCCCCGGGAGTATAACAGAA  
ACCTTAAGGCCCGACCGCTTGACAAGGGCGCGTGAGGTTTTTACGATAGCGCCGGATGCGGGGA  
AAAAGGGCTCCTTTTGGGGGGTTTTCCCGCACCGGGCGGACCTGGGCGGAGAGGAAACGCGGC  
AACTCGCCCGTCTCGGGTTCCCGCCACGACCCTTAAGGAGGTGTGAGGCATATGGCCAAGTTG  
ACCAGTGCCGTTCCGGTGCTCACCGCGCGACGTCGCCGGAGCGGTGAGATTCTGGACCGACC  
GGCTCGGGTTCTCCCGGACTTCGTGGAGGACGACTTCGCCGGTGTGGTCCGGGACGACGTGAC  
CCTGTTTCATCAGCGCGGTCCAGGACCAGGTGGTGCCGGACAACACCCAGGCCTGGGTGTGGGTG  
CGGGCCCTGGACGAGCTGTACGCCGAGTGGTTCGGAGGTCGTGTCCACGAACTTCCGGGACGCCT  
CCGGGCCCGCCATGACCGAGATCGTCGAGCAGCCGTGGGGGCGGGAGTTCGCCCTGCGCGACCC  
GGCCGGCAACTGCGTGCACCTTCGTGGCCGAGGAGCAGGACTAATCCAGAGGATCCCCGGGTACC  
GAATTCGCGGCCGCTTCTAGAGCTAAATACATTCAAATATCTATCCGCTCATGAGACAATAACC  
CTGATAAATGCTTCAATAATATTGAAAAAGGAAGAATATGAGTATTCAACATTTCCGTGTGCC  
CTTATTCCTTTTTTGGCGCATTTTGCCTTCTGTTTTTGGTACCCAGAAACGCTGGTGAAAG  
TAAAAGATGCCGAAGATCAGTTGGGTGCACGTGTGGGTACATCGAACTGGACCTCAACAGCGG  
TAAGATTCTTGAGAGTTTTTCGCCCCGAAGAACGTTTTCCAATGATGAGCACTTTTAAAGTTCTG  
CTCTGTGGCGCGGTATTATCCCGTATTGACGCCGGGCAAGAGCAACTCGGTGCGCCGATACACT  
ATTCTCAGAATGACTTGGTTGAGTACTACCAGTCACAGAAAAGCATCTTACGGACGGCATGAC  
AGTACGCGAATTATGCAGCGCTGCCATAACCATGAGTGATAACACGGCGGCCAACTTACTTCTG  
ACAACGATCGGAGGACCGAAGGAGCTTACCCTTTTTTGCACAACATGGGTGATCATGTAACCTC  
GCCTTGATCGTTGGGAACCGGAGCTGAATGAAGCCATACCAAACGACGAGCGTGACACCACGAT  
GCCTGTAGCTATGGCAACAACGTTGCGCAAACCTTAACTGGCGAACTTCTTACTCTCGCTTCC  
CGGCAACAATTAATAGACTGGATGGAGGCGGATAAAGTTGCAGGACCACTTCTGCGCTCGGCC  
TTCCGGCTGGCTGGTTTTATTGCTGATAAATCTGGAGCCGGTGAGCGTGGGTCCCGCGGTATTAT  
TGCAGCCCTGGGGCCAGATGGTAAGCCCTCCCGTATCGTAGTTATCTACACGACGGGGAGCCAG  
GCAACTATGGACGAACGTAATCGCCAGATCGCTGAGATAGGTGCCTCCCTGATTAAGCATTGGT  
AATAATACTAGTAGCGGCCGCTGCAGGTACCGAGCTCGACTTCGTAATCATGTGCATAGCTGTTT  
CCTGTGTGAAATTGTTATCCGCTCACAATTCCACACAACATACGAGCCGGAAGCATAAAGTGTA  
AAGCCTGGGGTGCCTAATGAGTGAGCTAACTCACATTAATTGCGTTGCGCTCACTGCCCGCTTT  
CCAGTCGGGAAACCTGTGCTGCCAGCTGCATTAATGAATCGGCCAACGCGCGGGGAGAGGCGGT  
TTGCGTATTGGGCGCTCTTCCGCTTCTCGCTCACTGACTCGCTGCGCTCGGTGCTTCGGCTGC  
GGCGAGCGGTATCAGCTCACTCAAAGGCGGTAATACGGTTATCCACAGAATCAGGGGATAACGC  
AGGAAAGAACATGTGAGCAAAAGGCCAGCAAAAGGCCAGGAACCGTAAAAAGGCCGCGTTGCTG  
GCGTTTTTCCATAGGCTCCGCCCCCTGACGAGCATCACAAAAATCGACGCTCAAGTCAGAGGT  
GGCGAAACCCGACAGGACTATAAAGATACCAGGCGTTTTCCCCCTGGAAGCTCCCTCGTGCGCTC  
TCCTGTTCCGACCCTGCCGCTTACCGGATACCTGTCCGCTTTCTCCCTTCGGGAAGCGTGGCG  
CTTTCTCAAAGCTCACGCTGTAGGTATCTCAGTTCGGTGTAGGTGCTTCGCTCCAAGCTGGGCT  
GTGTGCACGAACCCCCGTTACGCCCCGACCGCTGCGCCTTATCCGGTAACTATCGTCTTGAGTC  
CAACCCGGTAAGACACGACTTATCGCCACTGGCAGCAGCCACTGGTAACAGGATTAGCAGAGCG  
AGGTATGTAGGCGGTGCTACAGAGTTCTTGAAGTGGTGGCCTAACTACGGCTACACTAGAAGAA  
CAGTATTTGGTATCTGCGCTCTGCTGAAGCCAGTTACCTTCGGAAAAAGAGTTGGTAGCTCTTG  
ATCCGGCAAACAACCACCGCTGGTAGCGGTGGTTTTTTTTGTTTGCAAGCAGCAGATTACGCGC

AGAAAAAAGGATCTCAAGAAGATCCTTTGATCTTTTCTACGGGGTCTGACGCTCAGTGGAAACG  
AAAACCTCACGTAAAGGGATTTTGGTCATGAGATTATCAAAAAGGATCTTCACCTAGATCCTTTT  
AAATTA AAAATGAAGTTTTAAATCAATCTAAAGTATATATGAGTAAACTTGGTCTGACAGTTAC  
CAATGCTTAATCAGTGAGGCACCTATCTCAGCGATCTGTCTATTTTCGTTTCATCCATAGTTGCCT  
GACTCCCCGTCTGTAGATAACTACGATACGGGAGGGCTTACCATCTGGCCCCAGTGCTGCAAT  
GATACCGCGAGACCCACGCTCACCGGCTCCAGATTTATCAGCAATAAACCCAGCCAGCCGGAAGG  
GCCGAGCGCAGAAGTGGTC

**pJJS-Pro (4,646 bp)**

AGCTTGCATGCCTGTTGGCATGCCTCAGTTGACCCCATGACCCTTCTCTCTGGAGGTGGTAGC  
TAGAGGGGAATGGTCCCACCCTGGAGCCCCACCCTTGCCAACCCTGGGCCCGGTATAATGCCG  
GGCAATGGGAAGACCGGGCCCCCTGGGGGCCCAAGGCGCAGGGCCGCGTGAGGACCAAAAAGA  
GAGGCTCCCGCTGGGAGGGAACCCAAATTCAGCAACCTTTTTCTTCGCCTAAGGTTATCCCCT  
CCCAGCGGGAAAGGCAATAGGCGCCAAGGCGGCGCGGGGGAGTGCCGTCTCCGACGCGCGAA  
ACGGGAGGGGTTTATGCCCAAGAAGGAGTTGAAGGGAAGAGCTATAAAGAACAGCCGGAAGGA  
CTCACCGAGCGGGGCCGGCCTTCTCGAGGCCCTGGCCCCGAGGAAGCGGGCGAGGGGCGAGG  
AGCTTCCGCCCTTACCTGAAGCTCCTGGAGGGGGCCGCGCCCCCGGAGAAGGGGGTCCATGA  
GCCCCCGCCCGAGGAGGCGCCTCCCCCGAGGACCTCCGCCGGAAGCTCCGGGAGGCGCCGCT  
TCCCCGGCCCTCCCCAACCGACAGGAGCTCTCCGCCTCCCCGCCCCCGCCGAGATGAGGCGGG  
ACGCCTGGAGCCTCGCCGACCGCCTCCTGGAGGAGGGGAGCGGCGGGGCACCCTGCCAGGGCT  
TTCCGAGCGGGAGCGGAGGGTGTACCGGACCCTCCTCGCCCTGGGCCTCGAGGTCCTGGCCCCG  
AGGCTGGGCCCGGGGAGGCCCTGCCCAGGAACCTGTCCCAGGTCTCCTTCTTCGCCGTGAACG  
ACGCCCTGGCCGTGGCCCTGGGAATCCCCCGGCCTCCCTCTACCGGGTCTTGGCCTCCCTGGA  
GGCCAAGGGGCTCATCCGCCGGAGGGCCTGGCGCACCCCGCCACCCTCAAGGGCCGGACGGGG  
GTCTACGCCGGCGGGACCCTCTACGCCGTGCGCCTGCCCCACCGGGAGGCCCGCCCCGCCTGG  
ACCCGGAGGACTTCCGCCACCCTTGGCGGGACCTGGAGGGGGACGCCCGTCAGGGGCGCACCCG  
CTGGAGCTTGAGAGAGTCATATAAAGTCTCCTAAGGAGGACTCCGGGGTCTCCAGCTCCTC  
CTTCGGTTTTTCGTTATCCCCTGGCGAAGCCGAAACTCCGTTAGCTTTAGACTCTCTCACCGCCC  
TCTCCGGGCCCGCCCCGCGAGCGCCGGGCCCTGGTGGAGGCCCTCGCCCTCTCCCTGGCCCCG  
GGAGTTCCGGGATCCCGGGAGCGTGCCTTCTACGCCCTGGGTCTCTGGAACGCCCTCCGGGCC  
GAGCTCTACGGCCTGATGGAGGGGGCCCTCGAGGCCGTCGCTGGGCGGTCCGGCGGGCGCGGG  
AGGCCGCGGCCAAGGTCTCTGGAGCCGAGGGGCGAGGGGGTCCGGCGCCCCGGGGCCCTCCT  
CGCCACCTCCTCCGGGAGCGGGGCCTCCTGGAGCTCTTCCGCCAGGCCCTCAGTGGCGGGTG  
GCGTAGGGCTCCCGCCGGGCTAAGCTGGAGGTAGCCCATCCAGGGCCTCTGGGGGGTGGCTTGT  
GTATCAAGACTGGCTGTTCAAGGACTGCCCAGGGGGCTGGCGCCTCCGCTACCGCCGGAACGGG  
GGCGGCTACGAGGCCTCCCGGGACGGTGAGAGGTGGGAGAAGGTCCCCTCGGTACGGAGGTTA  
CGGGGCGCCTGAACAAGAACCTTCAGGACTGGGCCGTGCGCCAGGTGGTGGAGTACCTCCAGGG  
GGAGCTGGTCCCAGGGCTGGTCTCACGGAGGAGGAGGTGAACCGCCTCCTGGACGGTGCCTCC  
AAAGCCCACCGCCTGGCCGCGCAGAGGGCCGCCGGGCGAGGCGCCGACCTCCACGCCTGGGCGG  
AGGCCTACCTCAAAGGGCAAAGGCCTCCCTTCCCCGAGGAGGAGCCCCCTTCGGGGGATGGCCCT  
CGCCCTGGCGGACTGGTGGGACGGGAACGGGGGCGAGGCCCTGCGCTCCGAGGAGGCGGTCTTC  
CACCCGGAGCACCGCTACGCCGGGCGGGTGGACCTGGTGGCCCCGGCTGGGGGGGAGGGTGGTGG  
TGGTGGACCTGAAGACCTCCCCCGGGCCTACCCGGAGCACCTCCTCCAGGTGGGGGCCCTACCC  
CCTGGCCCTCCGGGCGGAGGGGGTGGCGGTGGAGGGGGGCTTCGTGCTGGCCCTGAGGGAAGGC  
TTAGCCTCCAGGAGGTCCCCCTGGAGGAGGCGGCGCAGGCCTTCTGGGGCTCCTGGCCGTCCA  
CCGTTTTCTGAAGTCTCTCGAGGCTACCCCTGAGCACCCGCTTGTACCACACCTTAAGGGCCT  
CGAGGTCCCAGGCCACCACCGCCCGGCTCCCGTCGGGCCGGGGATCCCCGGGAGTATAACAGAA

ACCTTAAGGCCCGACCGCTTGACAAGGGCGCGTGAGGTTTTTACGATAGCGCCGGATGCGGGGA  
AAAAGGGCTCCTTTTGGGGGGTTTTCCCGCACCGGGCGGACCTGGGCGGAGAGGAAACGCGGC  
AACTCGCCCGTCTCGGGTTCCCGCCACGACCCTTAAGGAGGTGTGAGGCATATGGCCAAGTTG  
ACCAGTGCCGTTCCGGTGCTCACCGCGCGGACGTCGCCGGAGCGGTGAGTTCTGGACCGACC  
GGCTCGGGTTCTCCCGGGACTTCGTGGAGGACGACTTCGCCGGTGTGGTCCGGGACGACGTGAC  
CCTGTTTCATCAGCGCGGTCCAGGACCAGGTGGTGCCGGACAACACCCAGGCTGGGTGTGGGTG  
CGCGGCCTGGACGAGCTGTACGCCGAGTGGTCGGAGGTTCGTGTCCACGAACTTCCGGGACGCCT  
CCGGGCCCGCCATGACCGAGATCGTCGAGCAGCCGTGGGGGCGGGAGTTCCGCCCTGCGCGACCC  
GGCCGGCAACTGCGTGCACCTTCGTGGCCGAGGAGCAGGACTAATCCAGAGGATCCCGGGTACC  
GAATTCGCGGCCGCTTCTAGAGCCGGGAGTATAACAGAAACCTTAAGGCCCGACCGCTTGACAA  
GGGCGCGTGAGGTTTTTACGATAGCGCCGGATGCGGGGAAAAGGGCTCCTTTTGGGGGGTTTT  
CCCGCACCGGGCGGACCTGGGCGGAGAGGAAACGCGGCAACTCGCCGTCTCGGGTTCCCGCC  
CACGACCCTTAAGGAGGTGTGAGGTACTAGTAGCGGCCGCTGCAGGTACCGAGCTCGACTTCGT  
AATCATGTTCATAGCTGTTTTCTGTGTGAAATTGTTATCCGCTCACAATTCCACACAACATACGA  
GCCGGAAGCATAAAGTGTAAGCCTGGGGTGCCTAATGAGTGAGCTAACTCACATTAATTGCGT  
TGCGCTCACTGCCCGCTTCCAGTCGGGAAACCTGTGTCGCCAGCTGCATTAATGAATCGGCCA  
ACGCGCGGGGAGAGGCGGTTTTGCGTATTGGGCGCTCTTCCGCTTCCCTCGCTCACTGACTCGCTG  
CGCTCGGTTCGTTCCGGCTGCGGCGAGCGGTATCAGCTCACTCAAAGGCGGTAATACGGTTATCCA  
CAGAATCAGGGGATAACGCAGGAAAGAACATGTGAGCAAAAGGCCAGCAAAAGGCCAGGAACCG  
TAAAAGGCCGCGTTGCTGGCGTTTTTCCATAGGCTCCGCCCCCTGACGAGCATCACAAAAAT  
CGACGCTCAAGTCAGAGGTGGCGAAACCCGACAGGACTATAAAGATACCAGGCGTTTTCCCCCTG  
GAAGCTCCCTCGTGCCTCTCCTGTTCCGACCCTGCCGTTACC GGATACCTGTCCGCCTTTCT  
CCCTTCGGGAAGCGTGGCGCTTTCTCAAAGCTCACGCTGTAGGTATCTCAGTTCGGTGTAGGTC  
GTTTCGCTCCAAGCTGGGCTGTGTGCACGAACCCCCGTTACGCCGACCGCTGCGCCTTATCCG  
GTA ACTATCGTCTTGAGTCCAACCCGGTAAGACACGACTTATCGCCACTGGCAGCAGCCACTGG  
TAACAGGATTAGCAGAGCGAGGTATGTAGGCGGTGCTACAGAGTTCTTGAAGTGGTGGCCTAAC  
TACGGCTACACTAGAAGAACAGTATTTGGTATCTGCGCTCTGCTGAAGCCAGTTACCTTCGGAA  
AAAGAGTTGGTAGCTCTTGATCCGGCAAACAAACCACCGCTGGTAGCGGTGGTTTTTTTTGTTG  
CAAGCAGCAGATTACGCGCAGAAAAAAGGATCTCAAGAAGATCCTTTGATCTTTTTCTACGGGG  
TCTGACGCTCAGTGGAACGAAAACCTCACGTTAAGGGATTTTGGTTCATGAGATTATCAAAAAGGA  
TCTTACCTAGATCCTTTTAAATTA AAAATGAAGTTTTAAATCAATCTAAAGTATATATGAGTA  
AACTTGGTCTGACAGTTACCAATGCTTAATCAGTGAGGCACCTATCTCAGCGATCTGTCTATTT  
CGTTCATCCATAGTTGCCTGACTCCCCGTCGTGTAGATAACTACGATACGGGAGGGCTTACCAT  
CTGGCCCCAGTGCTGCAATGATACCGCGAGACCCACGCTCACCGGCTCCAGATTTATCAGCAAT  
AAACCAGCCAGCCGGAAGGGCCGAGCGCAGAAGTGGTC

**pJJS-Term (4,574 bp)**

AGCTTGCATGCCTGTTGGCATGCCTCAGTTGACCCATTGACCCTTCTCTCTGGAGGTGGTAGC  
TAGAGGGGAATGGTCCCACCCTGGAGCCCCACCCTTGCCAACCCTGGGCCCCGTATAATGCCG  
GGCAATGGGAAGACCGGGCCCCCTGGGGGCCCAAGGCGGCAGGGCCGCGTGAGGACCAAAAAGA  
GAGGCTCCCGCTGGGAGGGAACCCAAATTCAGCAACCTTTTTCTTCGCCTAAGGTTATCCCCCT  
CCCAGCGGAAAGGCAATAGGCGCAAGGCGCGCGGGGAGTGCCGTCTCCGACGCGCGAA  
ACGGGAGGGTTTTATGCCCAAGAAGGAGTTGAAGGGAAGAGCTATAAAGAACAGCCGGAAGGA  
CTCACCGAGCGGGGCCGGGCCTTCTCGAGGCCCTGGCCCGGAGGAAGCGGGCGAGGGGCGAGG  
AGCTTCCGCCCTCTACCTGAAGCTCCTGGAGGGGGCCGCGCCCCCGGAGAAGGGGGTCCATGA  
GCCCCCGCCGAGGAGGCGCCTCCCCCGAGGACCTCCGCCGGAAGCTCCGGGAGGCGCCGCCT  
TCCCCGGCCCTCCCCAACCGACAGGAGCTCTCCGCCTCCCCGCCCCCGCCGAGATGAGGCGGG

ACGCCTGGAGCCTCGCCGACCGCCTCCTGGAGGAGGGGAGCGGCGGGGCACCCTGCCAGGGCT  
TTCCGAGCGGGAGCGGAGGGTGTACCGGACCCTCCTCGCCCTGGGCTCGAGGTCTGGCCCCG  
AGGCTGGGCCCGGGGAGGCCCTGCCAGGAACCTGTCCCAGGTCTCCTTCTTCGCCGTGAACG  
ACGCCCTGGCCGTGGCCCTGGGAATCCCCCGGCCTCCTCTACCGGGTCTGGCCTCCCTGGA  
GGCAAGGGGCTCATCCGCCGGAGGGCCTGGCGCACCCCGGCCACCCTCAAGGGCCGGACGGGG  
GTCTACGCCGGCGGGACCCTCTACGCCGTGCGCCTGCCCCACCGGGAGGCCCGCCCCGCCTGG  
ACCCGGAGGACTTCCGCCACCCTGGCGGGACCTGGAGGGGGACGCCCGTCAGGGGGCGCACCCG  
CTGGAGCTTGAGAGAGTCATATAACAAGTCTCCTAAGGAGGACTCCGGGGTCTCCAGCTCCTC  
CTTCGGTTTTTCGTTATCCCCTGGCGAAGCCGAAACTCCGTTAGCTTTAGACTCTCTCACCGCCC  
TCCTCCGGGCCCCGCCCGAGCGCCGGGCCCTGGTGGAGGCCCTCGCCCTCTCCCTGGCCCG  
GGAGTTCGGGATCCCGGGAGCGTGCCTTCTACGCCCTGGGTCTCTGGAACGCCCTCCGGGCC  
GAGCTCTACGGCCTGATGGAGGGGGCCCTCGAGGCCGTCGCTGGGCGGTCCGGCGGGCGCGGG  
AGGCCGCGGCCAAGGTCTCTGGAGCCCGAGGGGCGAGGGGGTCCGGCGCCCCGGGGCCCTCCT  
CGCCACCTCCTCCGGGAGCGGGGCCTCCTGGAGCTCTTCCGCCAGGCCCTCAGTGGCGGGTG  
GCGTAGGGCTCCCGCCGGGCTAAGCTGGAGGTAGCCCATCCAGGGCCTCTGGGGGGTGGCTTGT  
GTATCAAGACTGGCTGTTCAAGGACTGCCAGGGGGCTGGCGCCTCCGCTACCGCCGGAACGGG  
GGCGGCTACGAGGCCTCCCGGGACGGTGGAGAGTGGGAGAAGGTCCCCTCGGTACGGAGGTTA  
CGGGGCGCCTGAACAAGAACCTTCAGGACTGGGCCGTGCGCCAGGTGGTGGAGTACCTCCAGGG  
GGAGCTGGTCCCGGGGCTGGTCTCACGGAGGAGGAGGTGAACCGCCTCCTGGACGGTGCCTCC  
AAAGCCCACCGCCTGGCCGCGCAGAGGGCCGCCGGGCGAGGCGCCGACCTCCACGCTGGGCGG  
AGGCCTACCTCAAAGGGCAAAGGCCTCCCTTCCCCGAGGAGGAGCCCTTCGGGGGATGGCCCT  
CGCCCTGGCGGACTGGTGGGACGGGAACGGGGGCGAGGCCCTGCGCTCCGAGGAGGCGGTCTTC  
CACCCGGAGACCGCTACGCCGGGCGGGTGGACCTGGTGGCCCGGCTGGGGGGGAGGGTGGTGG  
TGGTGGACCTGAAGACCTCCCCCGGGCCTACCCGGAGCACCTCCTCCAGGTGGGGGCCTACCC  
CCTGGCCCTCCGGGCGGAGGGGGTGGCGGTGGAGGGGGGCTTCGTGCTGGCCCTGAGGGAAGGC  
TTAGCCTCCAGGAGGTCCCCCTGGAGGAGGCGGCGCAGGCCTCCTGGGGCTCCTGGCCGTCCA  
CCGTTTTCTGAAGTCTCGAGGCTACCCCTGAGCACCCGCTTGTACCACACCTTAAGGGCCT  
CGAGGTCCCAGGCCACCACCGCCCGGCTCCCGTCCGGGCCGGGATCCCCGGGAGTATAACAGAA  
ACCTTAAGGCCCGACCGCTTGACAAGGGCGCGTGGAGTTTTTTACGATAGCGCCGGATGCGGGGA  
AAAAGGGCTCCTTTTGGGGGGTTTTTCCCCGCACCGGGCGGACCTGGGCGGAGAGGAAACGCGGC  
AACTCGCCCGTCTCGGGTTCGCGCCACGACCCTTAAGGAGGTGTGAGGCATATGGCCAAGTTG  
ACCAGTGCCGTTCCGGTGTCTACCGCGCGCAGCTCGCCGGAGCGGTGAGTTCTGGACCGACC  
GGCTCGGGTTCCTCCCGGACTTCGTGGAGGACGACTTCGCCGGTGTGGTCCGGGACGACGTGAC  
CCTGTTTCATCAGCGCGGTCCAGGACCAGGTGGTGCCGACAACACCAGGCCTGGGTGTGGGTG  
CGCGGCCTGGACGAGCTGTACGCCGAGTGGTCCGAGGTCGTGTCCACGAACTCCGGGACGCCT  
CCGGGCCCGCCATGACCGAGATCGTTCGAGCAGCCGTGGGGGCGGGAGTTCGCCCTGCGCGACCC  
GGCCGGCAACTGCGTGCCTTCGTGGCCGAGGAGCAGGACTAATCCAGAGGATCCCCGGGTACC  
GAATTCGCGGCCGCTTCTAGAGCTACACCGTAAAGTTCTAACCCCTGGCGGTCCCGCCCCCGCC  
CCCCAAAGGGGGCGGGGTTTTTGTTCCTCCCTTTGGGGAGGCGAGGGGCCCTATAC  
TTGGGTAAGGATGACTTACTAGTAGCGGCCGCTGCAGGTACCGAGCTCGACTTCGTAATCATGT  
CATAGCTGTTTCTGTGTGAAATGTTATCCGCTCACAATTCACACAACATACGAGCCGGAAG  
CATAAAGTGTAAGCCTGGGGTGCCTAATGAGTGAGCTAACTCACATTAATTGCGTTGCGCTCA  
CTGCCCGCTTTCAGTCCGGAAACCTGTCGTGCCAGCTGCATTAATGAATCGGCCAACGCGCGG  
GGAGAGGCGGTTTGCCTATTGGGCGCTCTTCCGCTTCCCTCGCTCACTGACTCGCTGCGCTCGGT  
CGTTCGGCTGCGGCGAGCGGTATCAGCTCACTCAAAGGCGGTAATACGGTTATCCACAGAATCA  
GGGGATAACGCAGGAAAGAACATGTGAGCAAAGGCCAGCAAAGGCCAGGAACCGTAAAAAGG  
CCGCGTTGCTGGCGTTTTTCCATAGGCTCCGCCCCCTGACGAGCATCACAAAATCGACGCTC

AAGTCAGAGGTGGCGAAACCCGACAGGACTATAAAGATACCAGGCGTTTCCCCCTGGAAGCTCC  
CTCGTGCGCTCTCCTGTTCCGACCCTGCCGCTTACCGGATACCTGTCCGCCTTTCTCCCTTCGG  
GAAGCGTGGCGCTTTCTCAAAGCTCACGCTGTAGGTATCTCAGTTCGGTGTAGGTCGTTTCGCTC  
CAAGCTGGGCTGTGTGCACGAACCCCCGTTCCAGCCCGACCGCTGCGCCTTATCCGGTAACTAT  
CGTCTTGAGTCCAACCCGGTAAGACACGACTTATCGCCACTGGCAGCAGCCACTGGTAACAGGA  
TTAGCAGAGCGAGGTATGTAGGCGGTGCTACAGAGTTCCTTGAAGTGGTGGCCTAACTACGGCTA  
CACTAGAAGAACAGTATTTGGTATCTGCGCTCTGCTGAAGCCAGTTACCTTCGAAAAAGAGTT  
GGTAGCTCTTGATCCGGCAAACAAACCACCGCTGGTAGCGGTGGTTTTTTTTGTTTGAAGCAGC  
AGATTACGCGCAGAAAAAAGGATCTCAAGAAGATCCTTTGATCTTTTCTACGGGGTCTGACGC  
TCAGTGAACGAAAACCTCACGTTAAGGGATTTTGGTCATGAGATTATCAAAAAGGATCTTCACC  
TAGATCCTTTTAAATTAATAATGAAGTTTTAAATCAATCTAAAGTATATATGAGTAAACTTGGT  
CTGACAGTTACCAATGCTTAATCAGTGAGGCACCTATCTCAGCGATCTGTCTATTTTCGTTTCATC  
CATAGTTGCCTGACTCCCCGTCGTGTAGATAACTACGATACGGGAGGGCTTACCATCTGGCCCC  
AGTGCTGCAATGATACCGCGAGACCCACGCTCACCGGCTCCAGATTTATCAGCAATAAACCAGC  
CAGCCGGAAGGGCCGAGCGCAGAAGTGTC

**pJJS-TnAK (5,315 bp)**

AGCTTGCATGCCTGTTGGCATGCCTCAGTTGACCCCATGACCCTTCTCTCTGGAGGTGGTAGC  
TAGAGGGGAATGGTCCCACCCTGGAGCCCCACCCTTGCCAACCCTGGGCCCGGTATAATGCCG  
GGCAATGGGAAGACCGGGCCCCCTGGGGGCCCAAGGCGGCAGGGCCGCGTGAGGACCAAAAAGA  
GAGGCTCCCGCTGGGAGGGAACCCAAATTCAGCAACCTTTTTCTTCGCCTAAGGTTATCCCCT  
CCCAGCGGGAAAGGCAATAGGCGCCAAGGCGGCGCGGGGGAGTGCCGTCTCCGACGCGCGAA  
ACGGGAGGGGTTTATGCCCAAGAAGGAGTTGAAGGGAAGAGCTATAAAGAACAGCCGGAAGGA  
CTCACCGAGCGGGGCCGGCCTTCTCGAGGCCCTGGCCCGGAGGAAGCGGGCGAGGGGCGAGG  
AGCTTCCGCCCTCTACCTGAAGCTCCTGGAGGGGGCCGCGCCCCCGGAGAAGGGGGTCCATGA  
GCCCCCGCCCGAGGAGGCGCCTCCCCCGGAGGACCTCCGCCGGAAGCTCCGGGAGGCGCCGCT  
TCCCCGGCCCTCCCCAACCGACAGGAGCTCTCCGCCTCCCCGCCCCCGCCGAGATGAGGCGGG  
ACGCCTGGAGCCTCGCCGACCGCTCCTGGAGGAGGGGAGCGGCGGGGCACCCTGCCAGGGCT  
TTCCGAGCGGGAGCGGAGGGTGTACCGGACCCTCCTCGCCCTGGGCTCGAGGTCCTGGCCCCG  
AGGCTGGGCCCGGGGAGGCCCTGCCCAGGAACCTGTCCCAGGTCTCCTTCTTCGCCGTGAACG  
ACGCCCTGGCCGTGGCCCTGGGAATCCCCCGGCCTCCTCTACCGGGTCCTGGCCTCCCTGGA  
GGCCAAGGGGCTCATCCGCCGGAGGGCCTGGCGCACCCCGGCCACCCTCAAGGGCCGGACGGGG  
GTCTACGCCGGCGGGACCCTCTACGCCGTGCGCCTGCCCCACCGGGAGGCCCGCCCCGCCTGG  
ACCCGGAGGACTTCCGCCACCCTGGCGGGACCTGGAGGGGGACGCCCGTCAGGGGCGCACCGC  
CTGGAGCTTGAGAGAGTCATATAAAGTCCTCCTAAGGAGGACTCCGGGGTCTCCAGCTCCTC  
CTTCGGTTTTTCGTTATCCCCTGGCGAAGCCGAAACTCCGTTAGCTTTAGACTCTCTCACCGCCC  
TCTCCGGGCCCCGCCCCGCGAGCGCCGGGCCCTGGTGGAGGCCCTCGCCCTCTCCCTGGCCCCG  
GGAGTTCCGGGATCCCGGGAGCGTGCCTTCTACGCCTGGGTCCTCTGGAACGCCCTCCGGGCC  
GAGCTCTACGGCCTGATGGAGGGGGCCCTCGAGGCCGTCGCTGGGCGGTCCGGCGGGCGCGGG  
AGGCCGCGGCCAAGGTCTCTGGAGCCCGAGGGGCGAGGGGGTCCGGCGCCCCGGGGCCCTCCT  
CGCCACCTCCTCCGGGAGCGGGGCCTCCTGGAGCTCTTCCGCCAGGCCCTCAGTGGCGGGTG  
GCGTAGGGCTCCCGCCGGGCTAAGCTGGAGGTAGCCCATCCAGGGCCTCTGGGGGTGGCTTGT  
GTATCAAGACTGGCTGTTCAAGGACTGCCCAGGGGGCTGGCGCTCCGCTACCGCCGGAACGGG  
GGCGGCTACGAGGCTCCCGGGACGGTGAGAGGTGGGAGAAGGTCCCCTCGGTACGGAGGTTA  
CGGGGCGCCTGAACAAGAACCTTCAGGACTGGGCCGTGCGCCAGGTGGTGGAGTACCTCCAGGG  
GGAGCTGGTCCCGGGGCTGGTCTCACGGAGGAGGAGGTGAACCGCCTCCTGGACGGTGCCTCC  
AAAGCCCACCGCCTGGCCGCGCAGAGGGCCGCGGGCGAGGCGCCGACCTCCACGCTGGGCGG

AGGCCTACCTCAAAGGGCAAAGGCCTCCCTTCCCCGAGGAGGAGCCCCTTCGGGGGATGGCCCT  
CGCCCTGGCGGACTGGTGGGACGGGAACGGGGCGAGGCCCTGCGCTCCGAGGAGGCGGTCTTC  
CACCCGGAGCACCGCTACGCCGGGCGGGTGGACCTGGTGGCCCGGCTGGGGGGGAGGGTGGTGG  
TGGTGGACCTGAAGACCTCCCCCGGGCCTACCCGGAGCACCTCCTCCAGGTGGGGGCCTACCC  
CCTGGCCCTCCGGGCGGAGGGGGTGGCGGTGGAGGGGGGCTTCGTGCTGGCCCTGAGGGAAGGC  
TTAGCCTCCAGGAGGTCCCCCTGGAGGAGGCGGCGCAGGCCTTCCTGGGGCTCCTGGCCGTCCA  
CCGCTTTCTGAAGGTCTCGAGGCTACCCCTGAGCACCCGCTTGTACCACACCTTAAGGGCCT  
CGAGGTCCCAGGCCACCACCGCCCGGCTCCCGTCCGGGCCGGGATCCCCGGGAGTATAACAGAA  
ACCTTAAGGCCCGACCGCTTGACAAGGGCGCGTGAGGTTTTTACGATAGCGCCGGATGCGGGGA  
AAAAGGGCTCCTTTTGGGGGGTTTTCCCCGCACCGGGCGGACCTGGGCGGAGAGGAAACGCGGC  
AACTCGCCCGTCTCGGGTTCGCGCCACGACCCTTAAGGAGGTGTGAGGCATATGGCCAAGTTG  
ACCAGTGCCGTTCCGGTGTCAACGCGCGCAGCTCGCCGGAGCGGTGAGTCTGGACCGACC  
GGCTCGGGTTCCTCCGGGACTTCGTGGAGGACGACTTCGCCGGTGTGGTCCGGGACGACGTGAC  
CCTGTTTCATCAGCGCGGTCCAGGACCAGGTGGTGCCGGACAACACCCAGGCCTGGGTGTGGGTG  
CGCGCCCTGGACGAGCTGTACGCCGAGTGGTCCGAGGTCGTGTCCACGAACCTCCGGGACGCCT  
CCGGGCCCGCCATGACCGAGATCGTCGAGCAGCCGTGGGGGCGGGAGTTCGCCCTGCGCGACCC  
GGCCGGCAACTGCGTGCACCTTCGTGGCCGAGGAGCAGGACTAATCCAGAGGATCCCCGGGTACC  
GAATTCGCGGCCGCTTCTAGAGCCGGGAGTATAACAGAAACCTTAAGGCCCGACCGCTTGACAA  
GGGCGCGTGAGGTTTTTACGATAGCGCCGGATGCGGGGAAAAGGGCTCCTTTTGGGGGGTTTT  
CCCCGCACCGGGCGGACCTGGGCGGAGAGGAAACGCGGCAACTCGCCGTCTCGGGTTCGCGCC  
CACGACCCTTAAGGAGGTGTGAGGTACTAGATGATGGCTTATCTGGTGTCTCGGACCTCCAG  
GGCCCGGAAAAGGTACGTACGCAAAGCGAATCCAAGAAAAGACGGGTATTCCCATATATCCAC  
CGGCGACATCTTCAGAGATATTGTGAAGAAAGAAAACGATGAACTTGAAAGAAAATAAAGGAG  
ATAATGGAAAAGGGAGAAGTGGTTCCTGATGAACTGGTGAACGAGGTGTGAAAAGAAGACTTT  
CAGAGAAAAGATTGTGAAAAGGGTTCATTCTGGATGGGTATCCAAGGACCGTAGCCCAGGCGGA  
GTTTCTCGACTCTTTCTGGAATCCCAAACAAGCAACTCACAGCTGCCGTGCTTTTTGATGTT  
CCAGAGGACGTGGTGTCCAGAGGCTCACCTCGAGAAGAATCTGCCCAAAGTGCCGGTAGAATCT  
ACAACATGATTTCACTTCCACCAAAGAAGACGAACTGTGCGATGACTGTAAAGTAAAACCTCGT  
TCAGCGAGACGACGACAAAGAGGAAACGGTCAGACACAGATACAAGGTTTACCTCGAAAAAACT  
CAACCCGTGATAGACTATTACGGGAAAAGGGTATCCTCAAAGAGTGGACGGCACGATAGGGA  
TCGACAACGTGGTTGCCGAGGTACTCAAATAATAGGGTGGAGTGATAAATGATACTAGTAGCG  
GCCGCTGCAGGTACCGAGCTCGACTTCGTAATCATGTCATAGCTGTTTCTGTGTGAAATTGTT  
ATCCGCTCACAATCCACACAACATACGAGCCGGAAGCATAAAGTGTAAGCCTGGGGTGCCTA  
ATGAGTGAGCTAACTCACATTAATTGCGTTGCGCTCACTGCCCGCTTTCAGTCGGGAAACCTG  
TCGTGCCAGCTGCATTAATGAATCGGCCAACGCGCGGGGAGAGGCGGTTTGCCTATTGGGCGCT  
CTTCCGCTTCCCTCGCTCACTGACTCGCTGCGCTCGGTGTTTCGGCTGCGGCGAGCGGTATCAGC  
TCACTCAAAGGCGGTAATACGGTTATCCACAGAATCAGGGGATAACGCAGGAAAGAACATGTGA  
GCAAAGGCCAGCAAAGGCCAGGAACCGTAAAAGGCCGCGTTGCTGGCGTTTTTCCATAGGC  
TCCGCCCCCTGACGAGCATCACAAAATCGACGCTCAAGTCAGAGGTGGCGAAACCCGACAGG  
ACTATAAAGATAACCAGGCGTTTTCCCCCTGGAAGCTCCCTCGTGCCTCTCCTGTTCCGACCCTG  
CCGCTTACCGGATACCTGTCCGCCTTTCTCCCTTCGGGAAGCGTGGCGCTTTCTCAAAGCTCAC  
GCTGTAGGTATCTCAGTTCGGTGTAGGTCGTTTCGCTCCAAGCTGGGCTGTGTGCACGAACCCCC  
CGTTCAGCCCCGACCGCTGCGCCTTATCCGGTAACTATCGTCTTGAGTCCAACCCGGTAAGACAC  
GACTTATCGCCACTGGCAGCAGCCACTGGTAACAGGATTAGCAGAGCGAGGTATGTAGGCGGTG  
CTACAGAGTTCTTGAAGTGGTGGCCTAACTACGGCTACACTAGAAGAACAGTATTTGGTATCTG  
CGCTCTGCTGAAGCCAGTTACCTTCGGAAAAGAGTTGGTAGCTCTTGATCCGGCAAACAAACC  
ACCGCTGGTAGCGGTGGTTTTTTTTGTTTGAAGCAGCAGATTACGCGCAGAAAAAAGGATCTC



AAGAAGATCCTTTGATCTTTTCTACGGGGTCTGACGCTCAGTGGAACGAAAACCTCACGTTAAGG  
GATTTTGGTCATGAGATTATCAAAAAGGATCTTCACCTAGATCCTTTTAAATTA AAAATGAAGT  
TTTAAATCAATCTAAAGTATATATGAGTAAACTTGGTCTGACAGTTACCAATGCTTAATCAGTG  
AGGCACCTATCTCAGCGATCTGTCTATTTTCGTTTCATCCATAGTTGCCTGACTCCCCGTCGTGTA  
GATAACTACGATACGGGAGGGCTTACCATCTGGCCCCAGTGCTGCAATGATACCGCGAGACCCA  
CGCTCACCGGCTCCAGATTTATCAGCAATAAACCAGCCAGCCGGAAGGGCCGAGCGCAGAAGTG  
GTC

**pJJS-N+C (5,529 bp)**

AGCTTGCATGCCTGTTGGCATGCCTCAGTTGACCCCATGACCCTTCTCTCTGGAGGTGGTAGC  
TAGAGGGGAATGGTCCCACCCTGGAGCCCCACCCTTGCCAACCCTGGGCCCGGTATAATGCCG  
GGCAATGGGAAGACCGGGCCCCCTGGGGGCCCAAGGCGGCAGGGCCGCGTGAGGACCAAAAAGA  
GAGGCTCCCGCTGGGAGGGAACCCAAATTCAGCAACCTTTTTCTTCGCCTAAGGTTATCCCCT  
CCCAGCGGAAAGGCAATAGGCGCAAGGCGGCGCGGGGGAGTGCCGTCTCCGACGCGCGAA  
ACGGGAGGGGTTTATGCCCAAGAAGGAGTTGAAGGGAAGAGCTATAAAGAACAGCCGGAAGGA  
CTCACCGAGCGGGGCCGGGCCTTCCTCGAGGCCCTGGCCCCGAGGAAGCGGGCGAGGGGCGAGG  
AGCTTCCGCCCTCTACCTGAAGCTCCTGGAGGGGGCCGCGCCCCCGGAGAAGGGGGTCCATGA  
GCCCCCGCCCGAGGAGGCGCCTCCCCCGAGGACCTCCGCCGGAAGCTCCGGGAGGCGCCGCCT  
TCCCCGGCCCTCCCCAACCGACAGGAGCTCTCCGCCTCCCCGCCCCCGCCGAGATGAGGCGGG  
ACGCCTGGAGCCTCGCCGACCGCCTCCTGGAGGAGGGGGAGCGGCGGGGCACCCTGCCAGGGCT  
TTCCGAGCGGGAGCGGAGGGTGTACCGGACCCTCCTCGCCCTGGGCCTCGAGGTCCTGGCCCCG  
AGGCTGGGCCCGGGGAGGCCCTGCCCAGGAACCTGTCCAGGTCTCCTTCTTCGCCGTGAACG  
ACGCCCTGGCCGTGGCCCTGGGAATCCCCCGGCCTCCTCTACCGGGTCCTGGCCTCCCTGGA  
GGCCAAGGGGCTCATCCGCCGGAGGGCCTGGCGCACCCCGGCCACCCTCAAGGGCCGGACGGGG  
GTCTACGCCGGCGGGACCCTCTACGCCGTGCGCCTGCCCCACCGGGAGGCCCGCCCCCGCCTGG  
ACCCGGAGGACTTCCGCCACCCCTGGCGGGACCTGGAGGGGGACGCCCGTCAGGGGCGCACCGC  
CTGGAGCTTGAGAGAGTCATATAAAGTCCTCCTAAGGAGGACTCCGGGGTCTCCAGTCTCTC  
CTTCGGTTTTTCGTTATCCCCTGGCGAAGCCGAAACTCCGTTAGCTTTAGACTCTCTCACCGCCC  
TCCTCCGGGCCCGCCCCGCCGAGCGCCGGGCCCTGGTGGAGGCCCTCGCCCTCTCCCTGGCCCCG  
GGAGTTCGGGATCCCGGGAGCGTGCGCTTCTACGCCTGGGTCTCTGGAACGCCCTCCGGGCC  
GAGCTCTACGGCCTGATGGAGGGGGCCCTCGAGGCCGTCGCTGGGCGGTCCGGCGGGCGCGGG  
AGGCCGCGGCCAAGGTCTCTGGAGCCCGAGGGGCGAGGGGGTCCGGCGCCCCGGGGCCCTCCT  
CGCCACCTCCTCCGGGAGCGGGGCCTCCTGGAGCTCTTCCGCCAGGCCCTCAGTGGCGGGTG  
GCGTAGGGCTCCCGCCGGGCTAAGCTGGAGGTAGCCCATCCAGGGCCTCTGGGGGGTGGCTTGT  
GTATCAAGACTGGCTGTTCAAGGACTGCCAGGGGGCTGGCGCCTCCGCTACCGCCGGAACGGG  
GGCGGCTACGAGGCCTCCCGGGACGGTGAGAGGTGGGAGAAGGTCCCCTCGGTCACGGAGGTTA  
CGGGGCGCCTGAACAAGAACCTTCAGGACTGGGCCGTGCGCCAGGTGGTGGAGTACCTCCAGGG  
GGAGCTGGTCCCGGGGCTGGTCTCACGGAGGAGGAGGTGAACCGCCTCCTGGACGGTGCGTCC  
AAAGCCCACCGCCTGGCCGCGCAGAGGGCCGCCGGGCGAGGCGCCGACCTCCACGCTGGGCGG  
AGGCCTACCTCAAAGGGCAAAGGCCTCCCTTCCCCGAGGAGGAGCCCTTCGGGGGATGGCCCT  
CGCCCTGGCGGACTGGTGGGACGGGAACGGGGCGAGGCCCTGCGCTCCGAGGAGGCGGTCTTC  
CACCCGGAGCACCGCTACGCCGGGCGGGTGGACCTGGTGGCCCGGCTGGGGGGGAGGGTGGTGG  
TGGTGGACCTGAAGACCTCCCCCGGGCCTACCCGGAGCACCTCCTCCAGGTGGGGGCCTACCC  
CCTGGCCCTCCGGGCGGAGGGGGTGGCGGTGGAGGGGGGCTTCGTGCTGGCCCTGAGGGAAGGC  
TTAGCCTCCAGGAGGTCCCCCTGGAGGAGGCGGCGCAGGCCTCCTGGGGCTCCTGGCCGTCCA  
CCGCTTTCTGAAGGTCTTCGAGGCTACCCCTGAGCACCCGCTTGTACCACACCTTAAGGGCCT

CGAGGTCCCAGGCCACCACCGCCCGGCTCCCGTCGGGCGGGGATCCCCGGGAGTATAACAGAA  
ACCTTAAGGCCCGACCGCTTGACAAGGGCGCGTGAGGTTTTTACGATAGCGCCGGATGCGGGGA  
AAAAGGGCTCCTTTTTGGGGGGTTTTTCCCCGCACCGGGCGGACCTGGGCGGAGAGGAAACGCGGC  
AACTCGCCCGTCTCGGGTCCCCGCCACGACCCTTAAGGAGGTGTGAGGCATATGGCCAAGTTG  
ACCAGTGCCGTTCCGGTGCTCACCGCGCGACGTGCGCCGAGCGGTGAGTCTGGACCGACC  
GGCTCGGGTTCTCCCGGACTTCGTGGAGGACGACTTCGCCGGTGTGGTCCGGGACGACGTGAC  
CCTGTTTCATCAGCGCGGTCCAGGACCAGGTGGTGC CGGACAACACCCAGGCCTGGGTGTGGGTG  
CGCGGCCTGGACGAGCTGTACGCCGAGTGGTCGGAGGTCGTGTCCACGAACTCCGGGACGCCT  
CCGGGCCCGCCATGACCGAGATCGTCGAGCAGCCGTGGGGGCGGGAGTTCGCCCTGCGCGACCC  
GGCCGGCAACTGCGTGCACCTTCGTGGCCGAGGAGCAGGACTAATCCAGAGGATCCCCGGGTACC  
GAATTCGCGGCCGCTTCTAGAGCCGGGAGTATAACAGAAACCTTAAGGCCCGACCGCTTGACAA  
GGGCGCGTGAGGTTTTTACGATAGCGCCGGATGCGGGGAAAAGGGCTCCTTTTTGGGGGGTTTT  
CCCCGCACCGGGCGGACCTGGGCGGAGAGGAAACGCGGCAACTCGCCCGTCTCGGGTTCGCCGC  
CACGACCCTTAAGGAGGTGTGAGGTACTAGATGATGGCTTATCTGGTGTCTCGGACCTCCAG  
GGGCCGAAAAGGTACGTACGCAAAGCGAATCCAAGAAAAGACGGGTATTCCCCATATATCCAC  
CGGCGACATCTTCAGAGATATTGTGAAGAAAGAAAACGATGAACTTGGAAGAAAATAAAGGAG  
ATAATGGAAAAGGGAGAAGTGGTTCCTGATGAACTGGTGAACGAGGTTGTGAAAAGAAGACTTT  
CAGAGAAAGATTGATACTAGAGCCGGGAGTATAACAGAAACCTTAAGGCCCGACCGCTTGACAA  
GGGCGCGTGAGGTTTTTACGATAGCGCCGGATGCGGGGAAAAGGGCTCCTTTTTGGGGGGTTTT  
CCCCGCACCGGGCGGACCTGGGCGGAGAGGAAACGCGGCAACTCGCCCGTCTCGGGTTCGCCGC  
CACGACCCTTAAGGAGGTGTGAGGTACTAGATGTGTGAAAAGGGGTTCAATCTGGATGGGTATC  
CAAGGACCGTAGCCCAGGCGGAGTTTTCTCGACTCTTTCCTGGAATCCCAAAAACAAGCAACTCAC  
AGCTGCCGTGCTTTTTTGATGTTCCAGAGGACGTGGTTGTCCAGAGGCTCACCTCGAGAAGAATC  
TGCCCAAAGTGCGGTAGAATCTACAACATGATTTCACTTCCACCAAAGAAGACGAACTGTGCG  
ATGACTGTAAAGTAAACTCGTTCAGCGAGACGACGACAAAGAGGAAACGGTCAGACACAGATA  
CAAGGTTTACCTCGAAAAAACTCAACCCGTGATAGACTATTACGGGAAAAGGGTATCCTCAA  
AGAGTGGACGGCACGATAGGGATCGACAACGTGGTTGCCGAGGTAATAATAATAGGGTGGGA  
GTGATAAATGATACTAGTAGCGGCCGCTGCAGGTACCGAGCTCGACTTCGTAATCATGTCATAG  
CTGTTTTCTGTGTGAAATTTGTTATCCGCTCACAATTCACACAACATACGAGCCGGAAGCATAA  
AGTGTAAGCCTGGGGTGCCTAATGAGTGAGCTAACTCACATTAATTGCGTTGCGCTCACTGCC  
CGTTTTCCAGTCGGGAAACCTGTCGTGCCAGCTGCATTAATGAATCGGCCAACGCGCGGGGAGA  
GGCGGTTTGCATATTGGGCGCTCTTCCGCTTCCCTCGCTCACTGACTCGCTGCGCTCGGTGCTTC  
GGCTGCGGCGAGCGGTATCAGCTCACTCAAAGGCGGTAATACGGTTATCCACAGAATCAGGGGA  
TAACGCAGGAAAGAACATGTGAGCAAAGGCCAGCAAAGGCCAGGAACCGTAAAAAGGCCGCG  
TTGCTGGCGTTTTTCCATAGGCTCCGCCCCCTGACGAGCATCACAAAATCGACGCTCAAGTC  
AGAGGTGGCGAAACCCGACAGGACTATAAAGATACCAGGCGTTTTCCCCCTGGAAGCTCCCTCGT  
GCGCTCTCCTGTTCCGACCCTGCCGCTTACCGGATACCTGTCCGCCTTCTCCCTTCGGGAAGC  
GTGGCGCTTCTCAAAGCTCACGCTGTAGGTATCTCAGTTCGGTGTAGGTCGTTTCGCTCCAAGC  
TGGGCTGTGTGCACGAACCCCCGTTTCAGCCCCGACCGCTGCGCCTTATCCGGTAACTATCGTCT  
TGAGTCCAACCCGTAAGACACGACTTATCGCCACTGGCAGCAGCCACTGGTAAACAGGATTAGC  
AGAGCGAGGTATGTAGGCGGTGCTACAGAGTTCTTGAAGTGGTGGCCTAACTACGGCTACACTA  
GAAGAACAGTATTTGGTATCTGCGCTCTGCTGAAGCCAGTTACCTTCGGAAAAGAGTTGGTAG  
CTCTTGATCCGGCAAACAAACCACCGCTGGTAGCGGTGGTTTTTTTTGTTTGAAGCAGCAGATT  
ACGCGCAGAAAAAAGGATCTCAAGAAGATCCTTTGATCTTTTCTACGGGGTCTGACGCTCAGT  
GGAACGAAAACCTCACGTTAAGGGATTTTGGTCATGAGATTATCAAAAAGGATCTTCACCTAGAT  
CCTTTTTAAATTAATAATGAAGTTTTAAATCAATCTAAAGTATATATGAGTAAACTTGGTCTGAC  
AGTTACCAATGCTTAATCAGTGAGGCACCTATCTCAGCGATCTGTCTATTTTCGTTTCATCCATAG

TTGCCTGACTCCCCGTCGTGTAGATAACTACGATACGGGAGGGCTTACCATCTGGCCCCAGTGC  
TGCAATGATACCGCGAGACCCACGCTCACCGGCTCCAGATTTATCAGCAATAAACCAGCCAGCC  
GGAAGGGCCGAGCGCAGAAGTGGTC
